# Supplementary material for: Expression of PEI-coated gold nanoparticles carrying exogenous gene in periwinkle mesophyll cells and its practice in huanglongbing research
Source: PubMed Central journal article supplement — iScience. 2022 May 29;25(6):104479. doi: 10.1016/j.isci.2022.104479 (PMC9192802; doi:10.1016/j.isci.2022.104479), 2022-05-29
Supplement: mmc1.pdf [file mmc1.pdf]

**iScience, Volume 25**

**Supplemental information**

**Expression of PEI-coated gold nanoparticles  
carrying exogenous gene in periwinkle mesophyll  
cells and its practice in Huanglongbing research**

**Junzhe Zhang, Wenxue Lei, Yixuan Meng, Chengqian Zhou, Baihong Zhang, Jun  
Yuan, Min Wang, Dongqing Xu, Xiangchun Meng, and Wenli Chen**

## Supplemental information

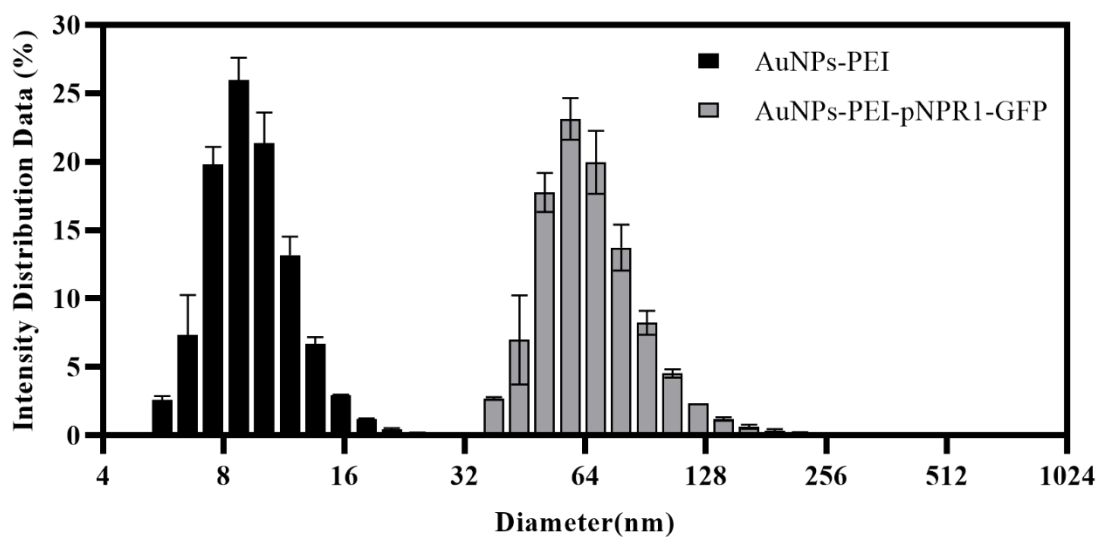

**Figure S1. The hydrated particle size of AuNPs-PEI-pNPR1-GFP. Related to Figure 3.**

The hydrated particle size of AuNPs-PEI-pNPR1-GFP measured was about 64 nm. Data were represented as means  $\pm$  S.D. from three repeats.

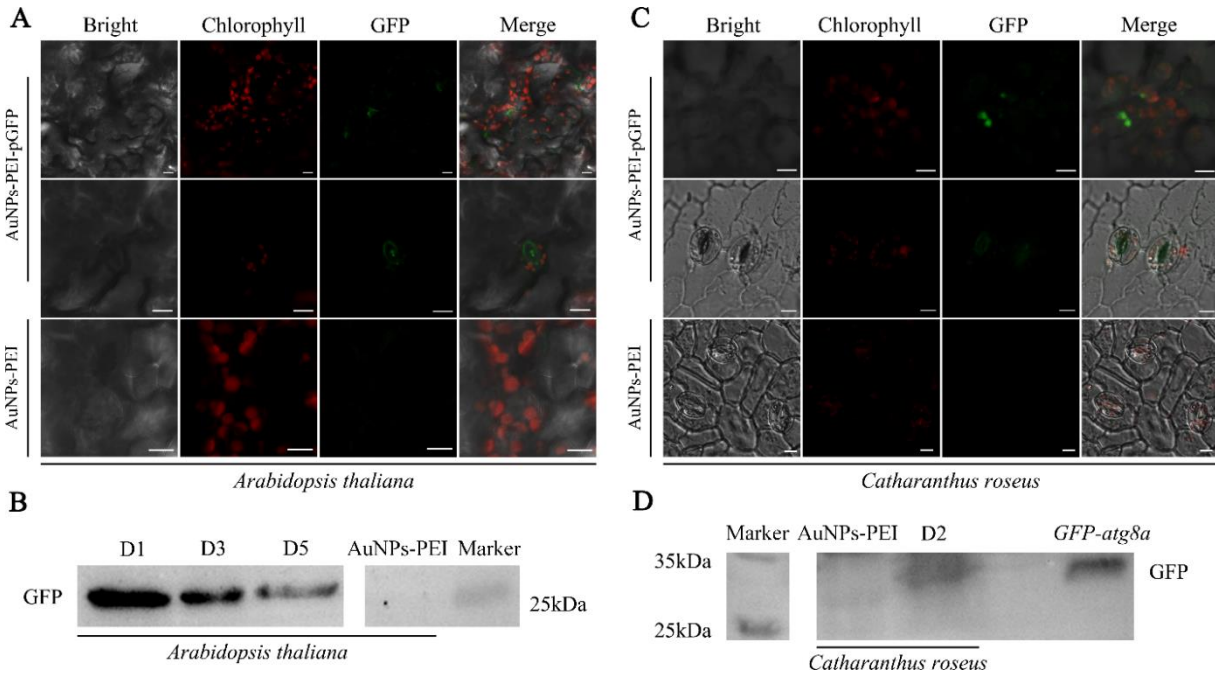

**Figure S2. AuNPs-PEI-pGFP could be expressed in *Arabidopsis* and *Catharanthus roseus* leaves by infiltration. Related to Figure 4.**

(A) 2 days after infiltration, GFP fluorescence was observed in *Arabidopsis* mesophyll cells. No GFP fluorescence was observed in the control group infiltrated with AuNPs-PEI only. The green fluorescence was the fluorescence of GFP, and the red fluorescence was the autofluorescence of chlorophyll. Scale bars, 10  $\mu$ m. (B) Western blot for GFP extracted *Arabidopsis* leaves 1-5 days after infiltration. The molecular weight of the target protein GFP was 27 kDa. Irrelevant or superfluous lanes had been eliminated from the blot. (C) 2 days after infiltration, punctate GFP fluorescence were observed in periwinkle mesophyll cells. No GFP fluorescence was observed in the control group infiltrated with AuNPs-PEI only. The green fluorescence was the fluorescence of GFP, and the red fluorescence was the autofluorescence of chlorophyll. Scale bars, 10  $\mu$ m. (D) Western blot for GFP extracted from AuNPs-PEI-pGFP-infiltrated healthy periwinkle leaves 2 days after infiltration. The molecular weight of the target protein GFP was 27 kDa. Irrelevant or superfluous lanes had been eliminated from the blot.

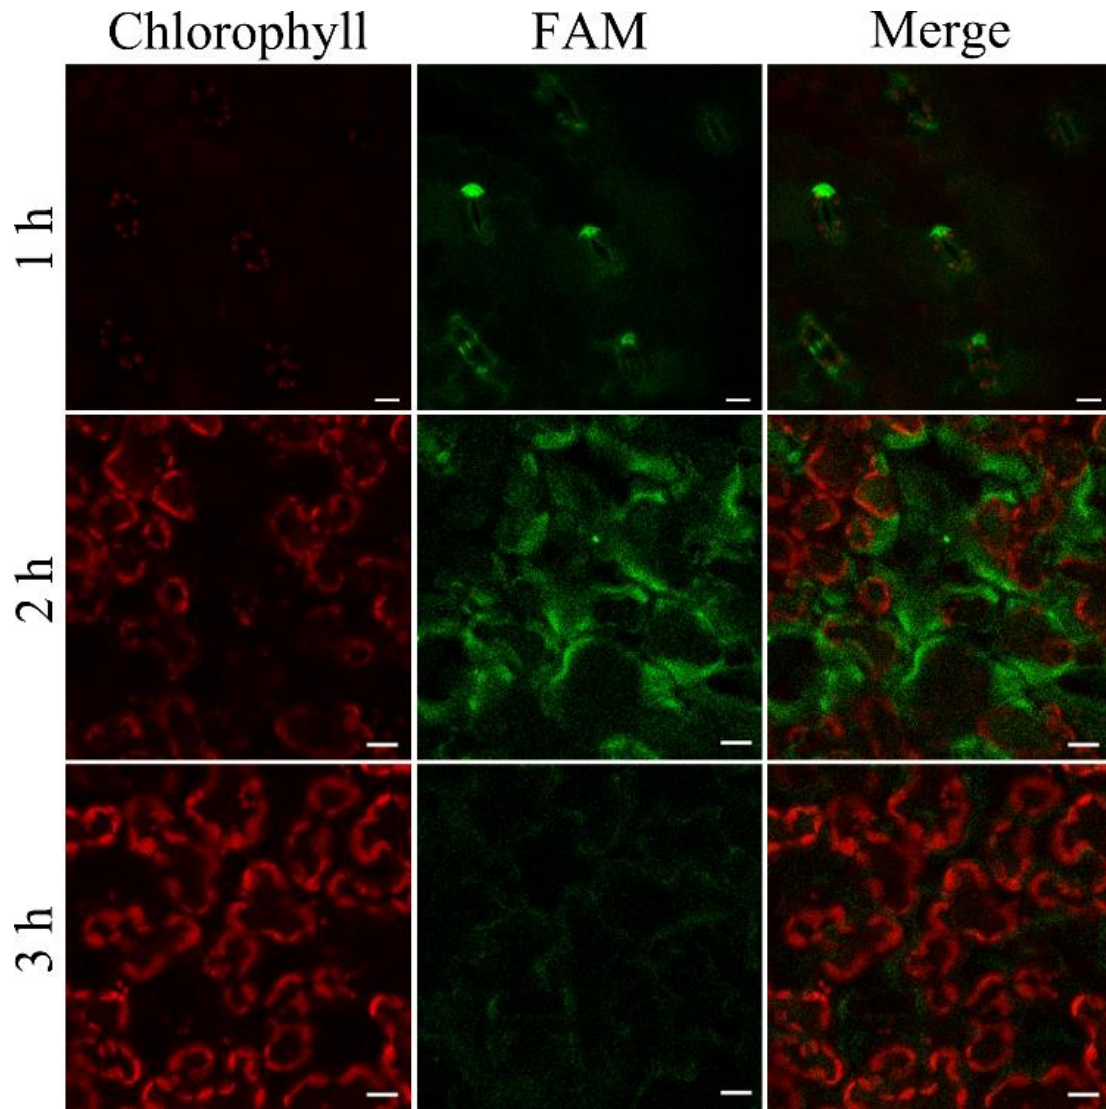

**Figure S3. Confocal observation of healthy periwinkle leaves after FAM-siRNA<sub>NPR1</sub> infiltration at different time points. Related to Figure 5.**

The green fluorescence came from FAM-siRNA<sub>NPR1</sub> or FAM. The red fluorescence was the autofluorescence of chlorophyll. Scale bars, 10  $\mu$ m.

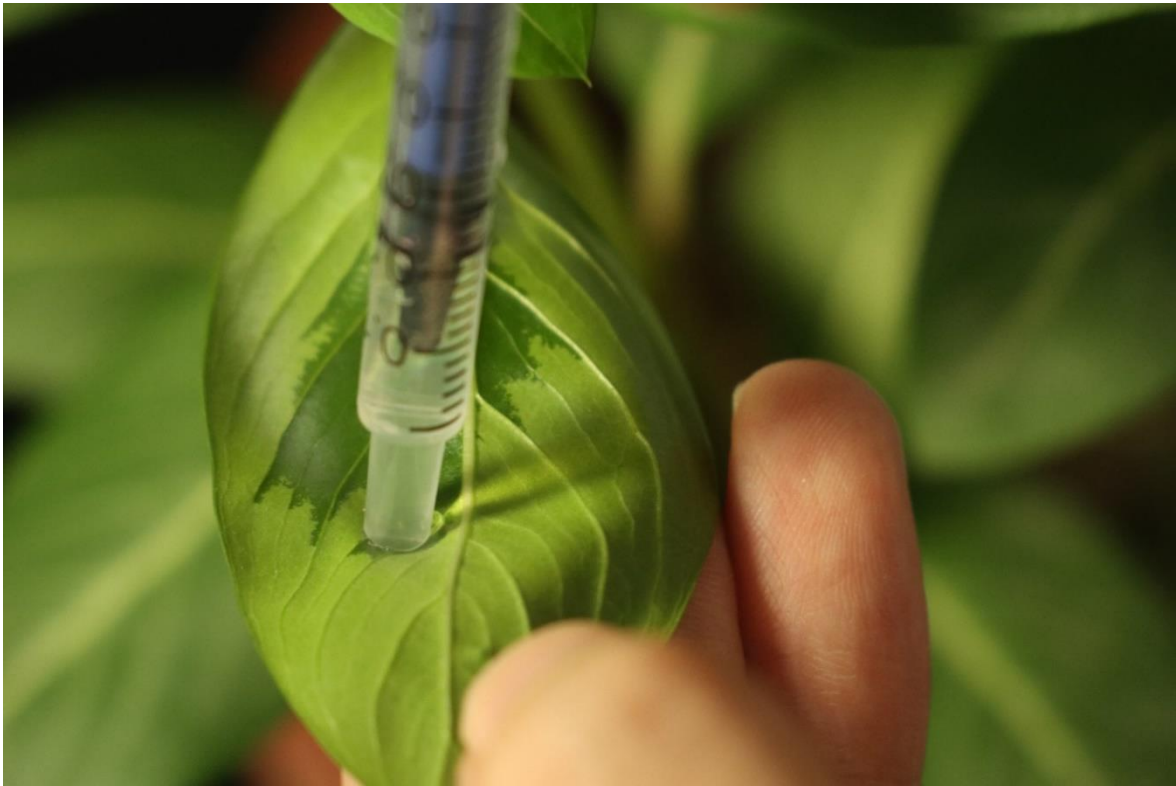

**Figure S4. Schematic diagram of infiltrating periwinkle leaves. Related to STAR Methods.**  
Leaves were infiltrated at 8-10 am. The criterion for completion of the infiltration was that the entire leaf was moistened.

**Table S1. Primers used for qPCR. Related to STAR Methods.**

| <b>Name</b>     | <b>Sequence (5'-3')</b>      | <b>Use</b>                    |
|-----------------|------------------------------|-------------------------------|
| <b>Cr18S-F</b>  | GACTACGTCCCTGCCCTTTG         | <i>18S rDNA</i> of periwinkle |
| <b>Cr18S-R</b>  | AACACTTCACCGGACCATTCA        | <i>18S rDNA</i> of periwinkle |
| <b>CrPR1a-F</b> | CAATGGACAAAGGAACAGATGC       | <i>PR1</i> of periwinkle      |
| <b>CrPR1a-R</b> | ATAATGTCCACAAACTCCGCCT       | <i>PR1</i> of periwinkle      |
| <b>CrPR2-F</b>  | GGAATCGAAGTACAAGATGGT        | <i>PR2</i> of periwinkle      |
| <b>CrPR2-R</b>  | AGCCAATTTTCAGATACCACA        | <i>PR2</i> of periwinkle      |
| <b>CrPR5-F</b>  | TACAATCTCCGCCTCCCA           | <i>PR5</i> of periwinkle      |
| <b>CrPR5-R</b>  | GCACCACCACAGTCACCA           | <i>PR5</i> of periwinkle      |
| <b>CrICS-F</b>  | TTGCAGGCAGATTACGCTCT         | <i>ICS</i> of periwinkle      |
| <b>CrICS-R</b>  | TGCCCGTGCATCTTCCATAG         | <i>ICS</i> of periwinkle      |
| <b>mGFP-F</b>   | AGTGGAGAGGGTGAAGGTGATG       | <i>NPR1-GFP</i>               |
| <b>mGFP-R</b>   | GCATTGAACACCATAAGAGAAAGTAGTG | <i>NPR1-GFP</i>               |
| <b>HLBr</b>     | GCGTTATCCCGTAGAAAAAGGTAG     | 16S rDNA of CLas              |
| <b>HLBas</b>    | TCGAGCGCGTATGCAATACG         | 16S rDNA of CLas              |
| <b>HLBp</b>     | FAM-AGACGGGTGAGTAACGCG-BHQ1  | TaqMan probes of CLas         |
